# Supplementary material for: Synergistic effect of S vacancies and P dopants in MoS2/Mo2C to promote electrocatalytic hydrogen evolution
Source: Royal Society of Chemistry journal article supplement (doi:10.1039/d2qi00829g), 2022-01-01
Supplement: d2qi00829g1.pdf [file d2qi00829g1.pdf]

Supplementary Information

**Synergistic effect of S vacancy and P dopants in MoS<sub>2</sub>/Mo<sub>2</sub>C to promote  
electrocatalytic hydrogen evolution**

Yaru Zhao <sup>a</sup>, Wang Xin <sup>a,b</sup>, Bitao Liu <sup>a,b</sup>, Hongxing Li <sup>a</sup>, Yuqing Xu <sup>a,b</sup>, Zixuan Zhang <sup>a</sup>

<sup>a</sup> *College of Physics and Optoelectronics Technology, Baoji University of Arts and Sciences, Baoji 721016, China*

<sup>b</sup> *Research Institute for New Materials Technology, Chongqing University of Arts and Sciences, Chongqing, 402160,  
China*

*Correspondence author. E-mail: liubitao007@163.com (B.T. Liu)*



---

## Contents

|                 |    |
|-----------------|----|
| Figure S1.....  | 1  |
| Figure S2.....  | 1  |
| Figure S3.....  | 2  |
| Figure S4.....  | 3  |
| Figure S5.....  | 4  |
| Figure S6.....  | 4  |
| Figure S7.....  | 5  |
| Figure S8.....  | 6  |
| Figure S9.....  | 6  |
| Figure S10..... | 7  |
| Figure S11..... | 7  |
| Figure S12..... | 8  |
| Figure S13..... | 8  |
| Figure S14..... | 9  |
| Figure S15..... | 9  |
| Figure S16..... | 10 |
| Table S1.....   | 11 |
| Reference.....  | 12 |

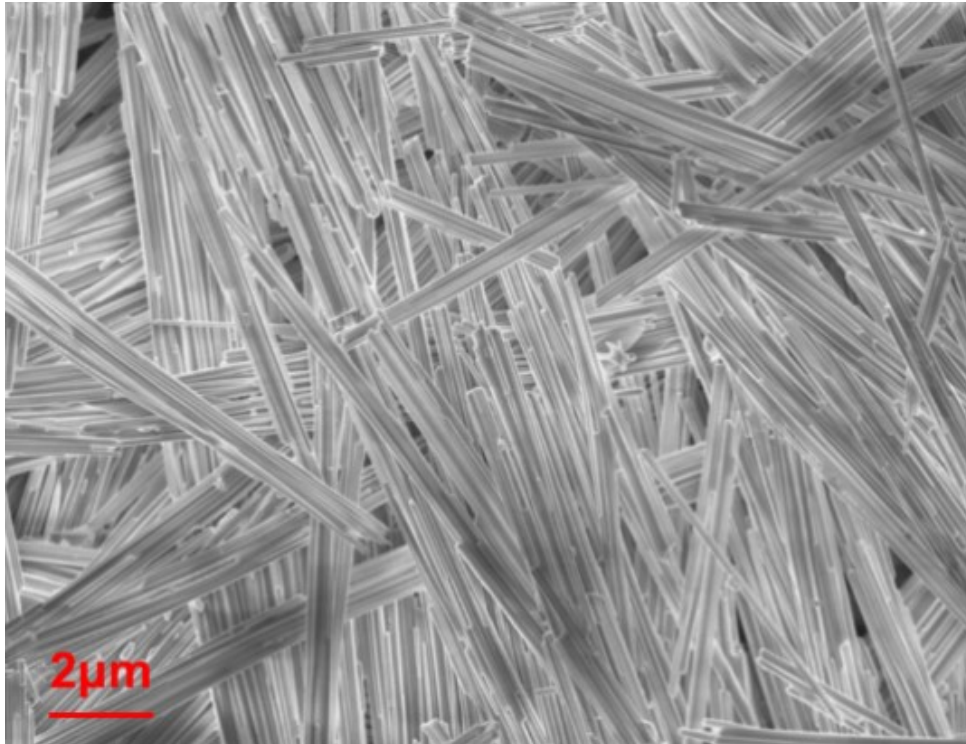

Figure S1. SEM image of Mo-MoF.

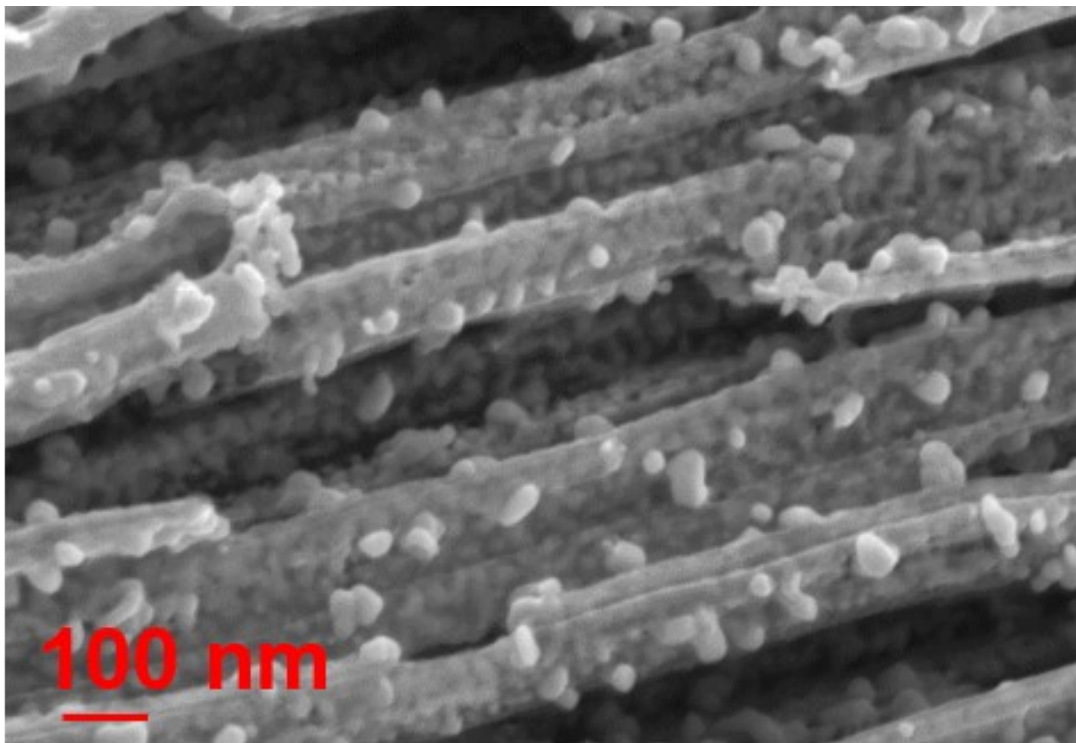

Figure S2. SEM image of Mo<sub>2</sub>C.

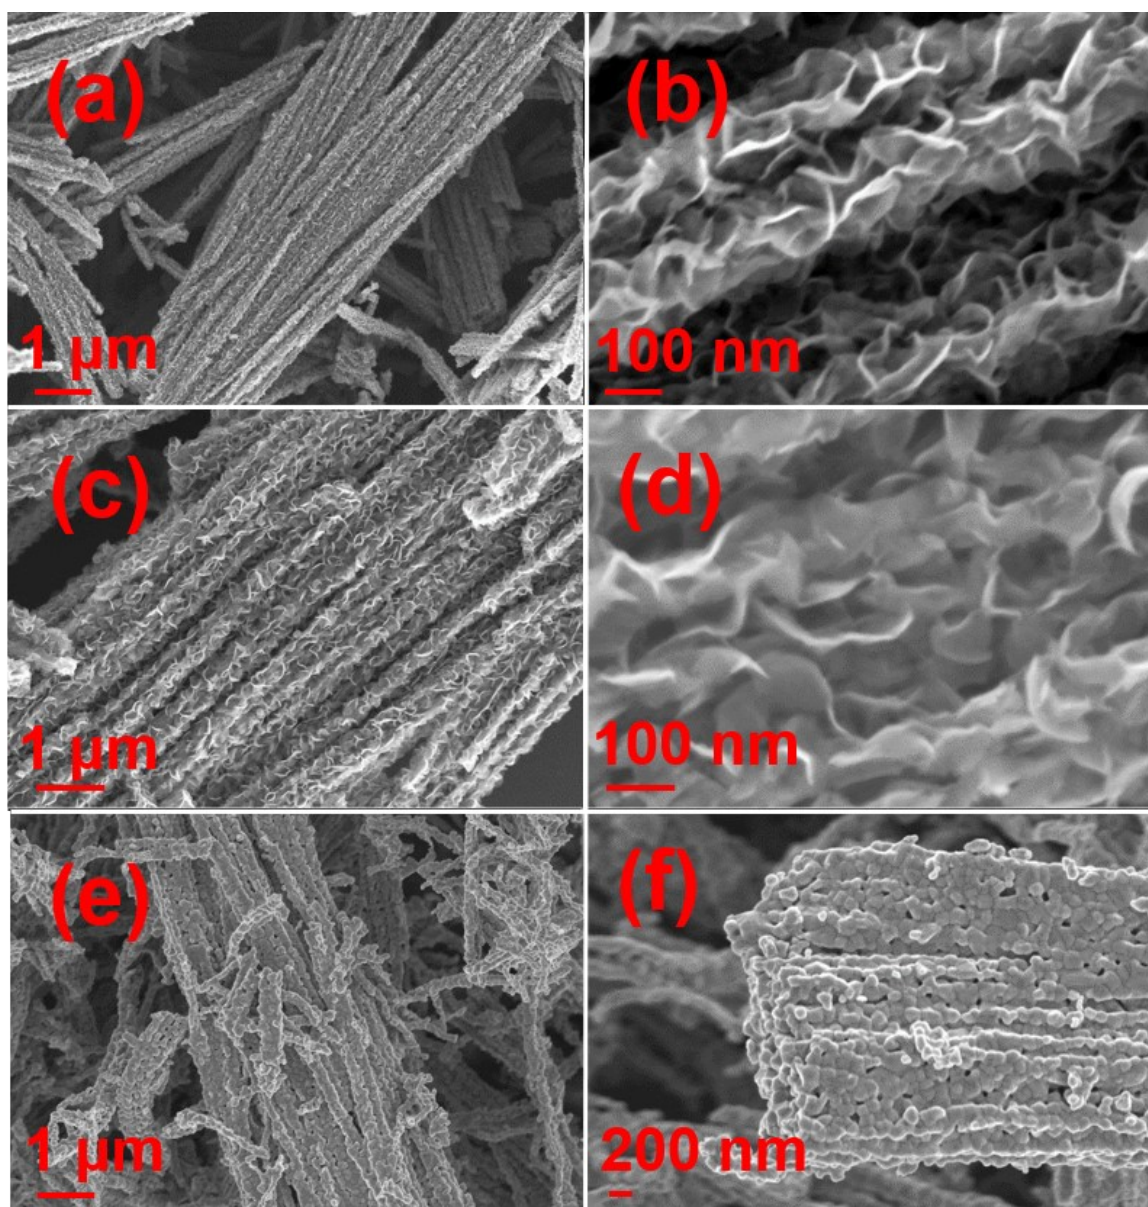

Figure S3. SEM image of different phosphating temperature (a,b) 600°C; (c,d) 700 °C; (e,f) 900 °C.

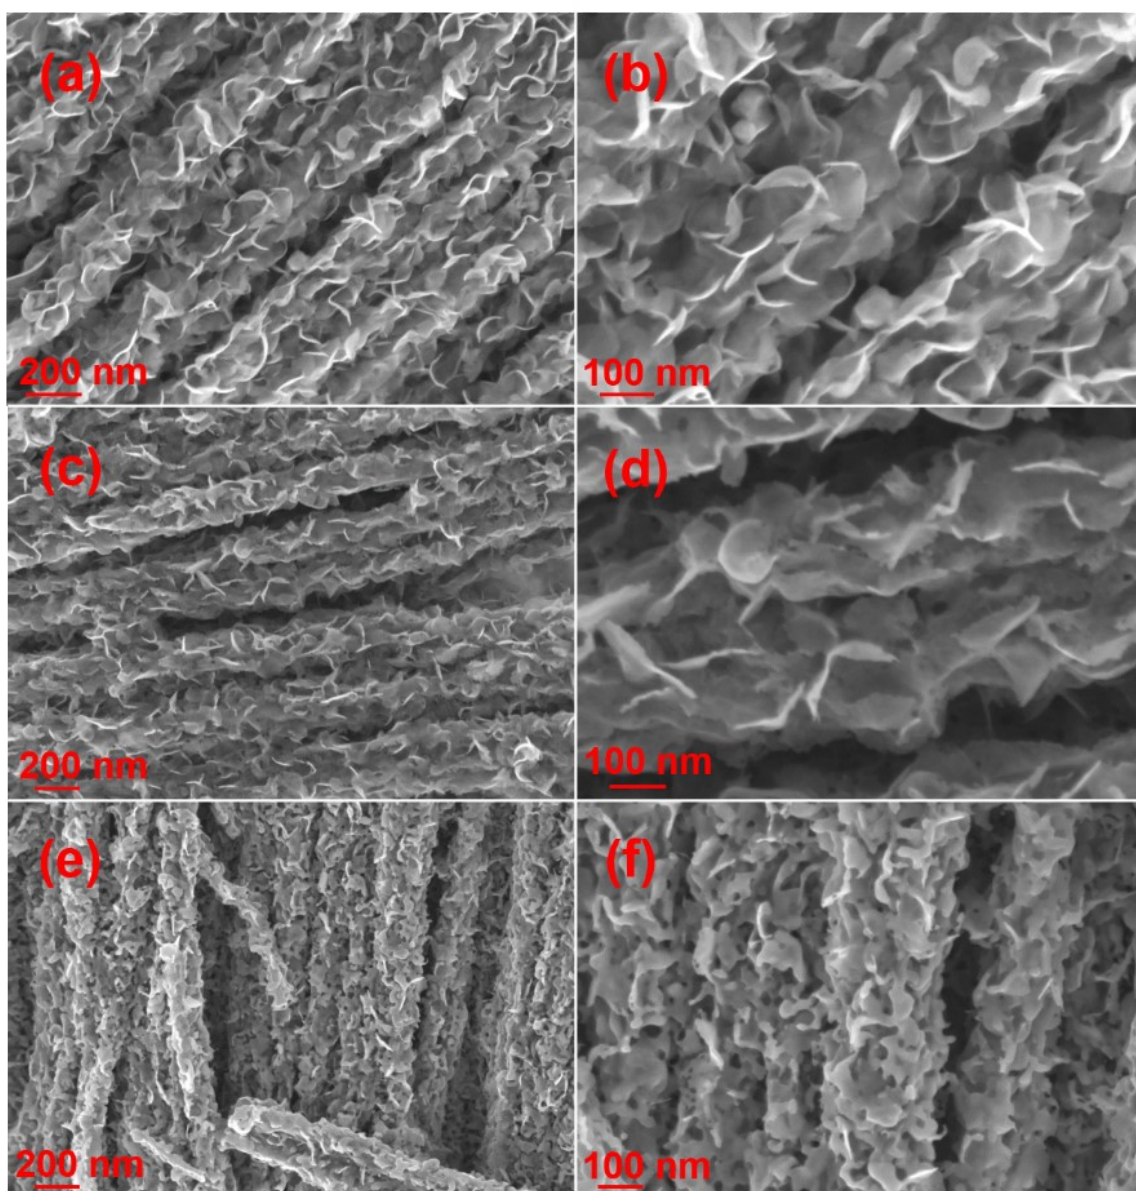

Figure S4. SEM image of different phosphorus content at 800 °C (a,b) 0.05g; (c,d) 0.2g; (e,f) 0.3g.

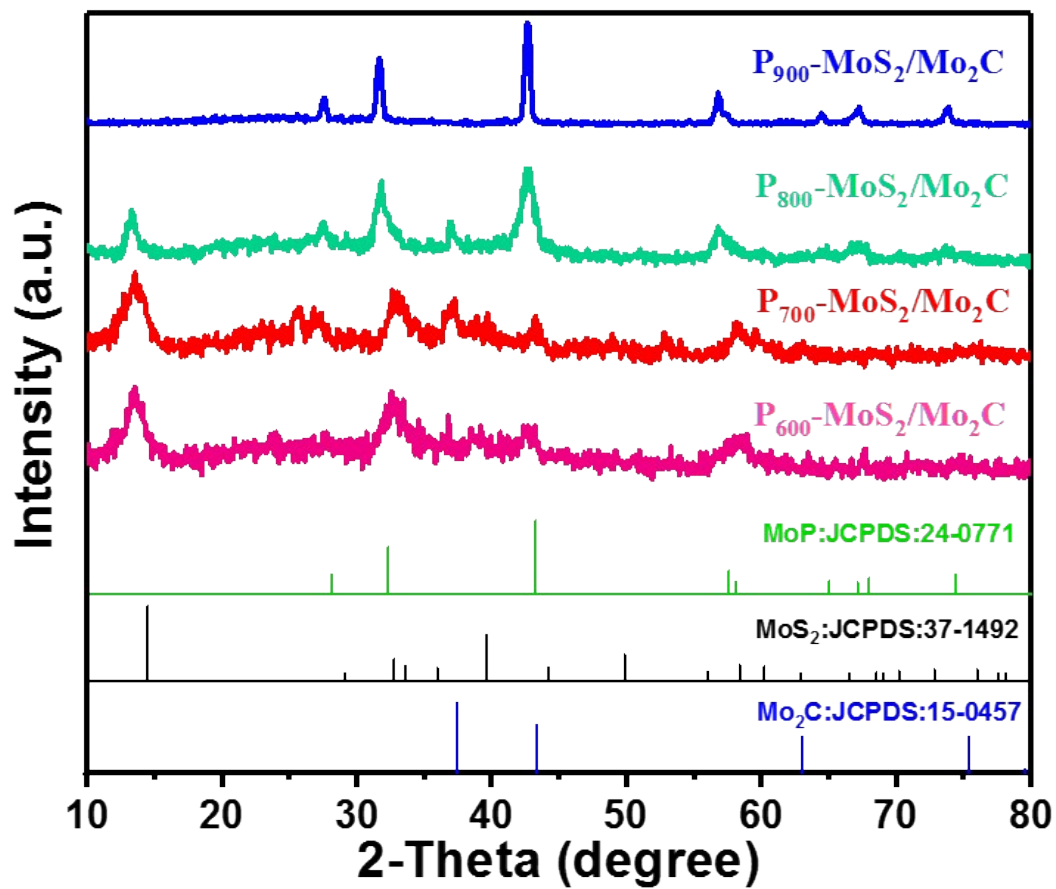

Figure S5. XRD patterns of different phosphating temperature (900°C, 800°C, 700°C, 600°C).

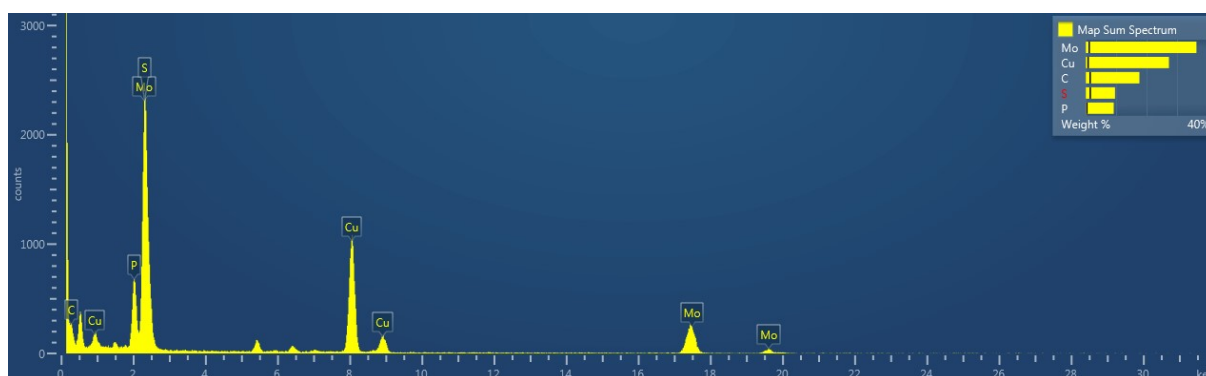

Figure S6. EDS spectra of P-MoS<sub>2</sub>/Mo<sub>2</sub>C.

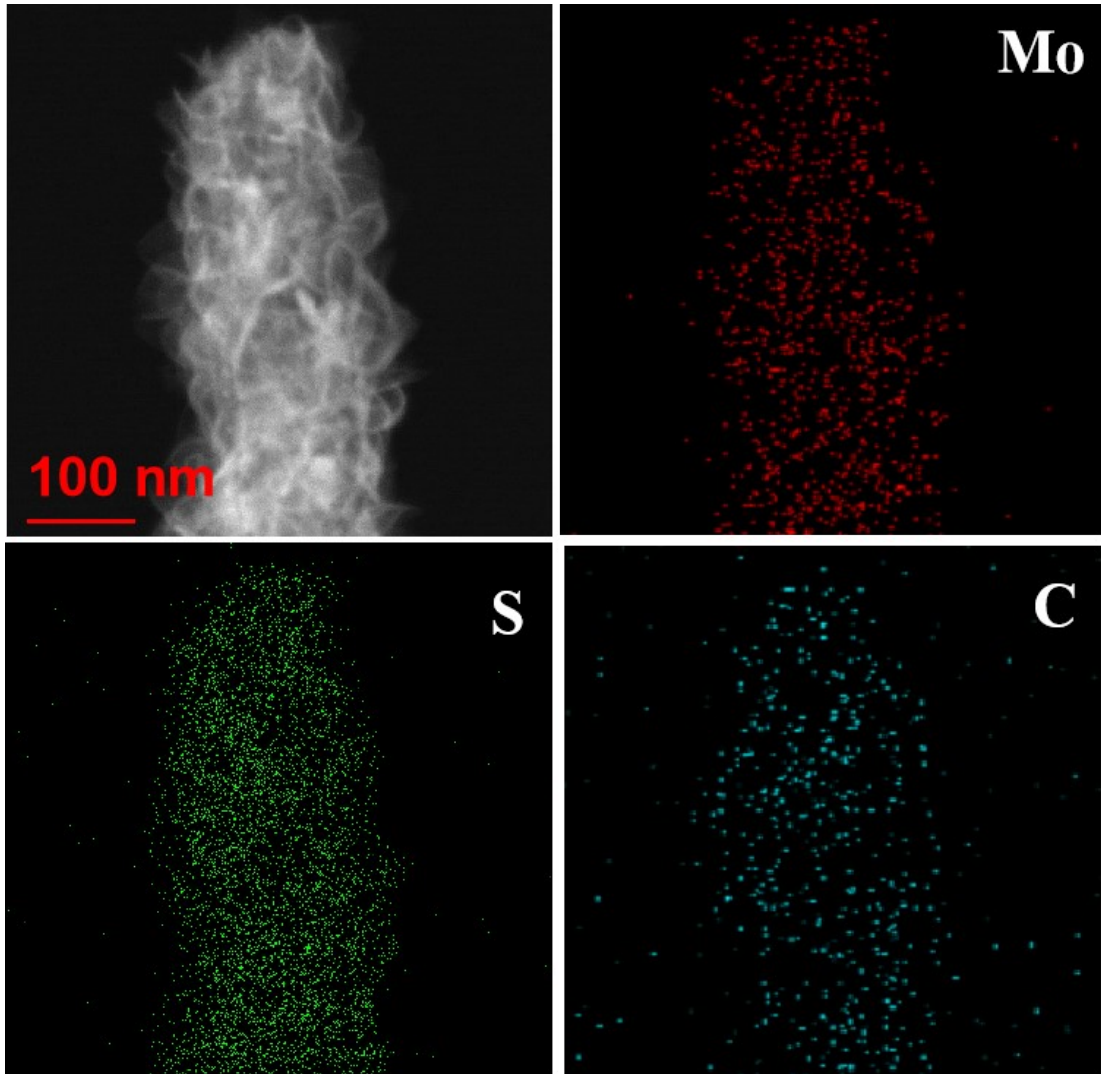

Figure S7. EDS elemental mappings of MoS<sub>2</sub>/Mo<sub>2</sub>C.



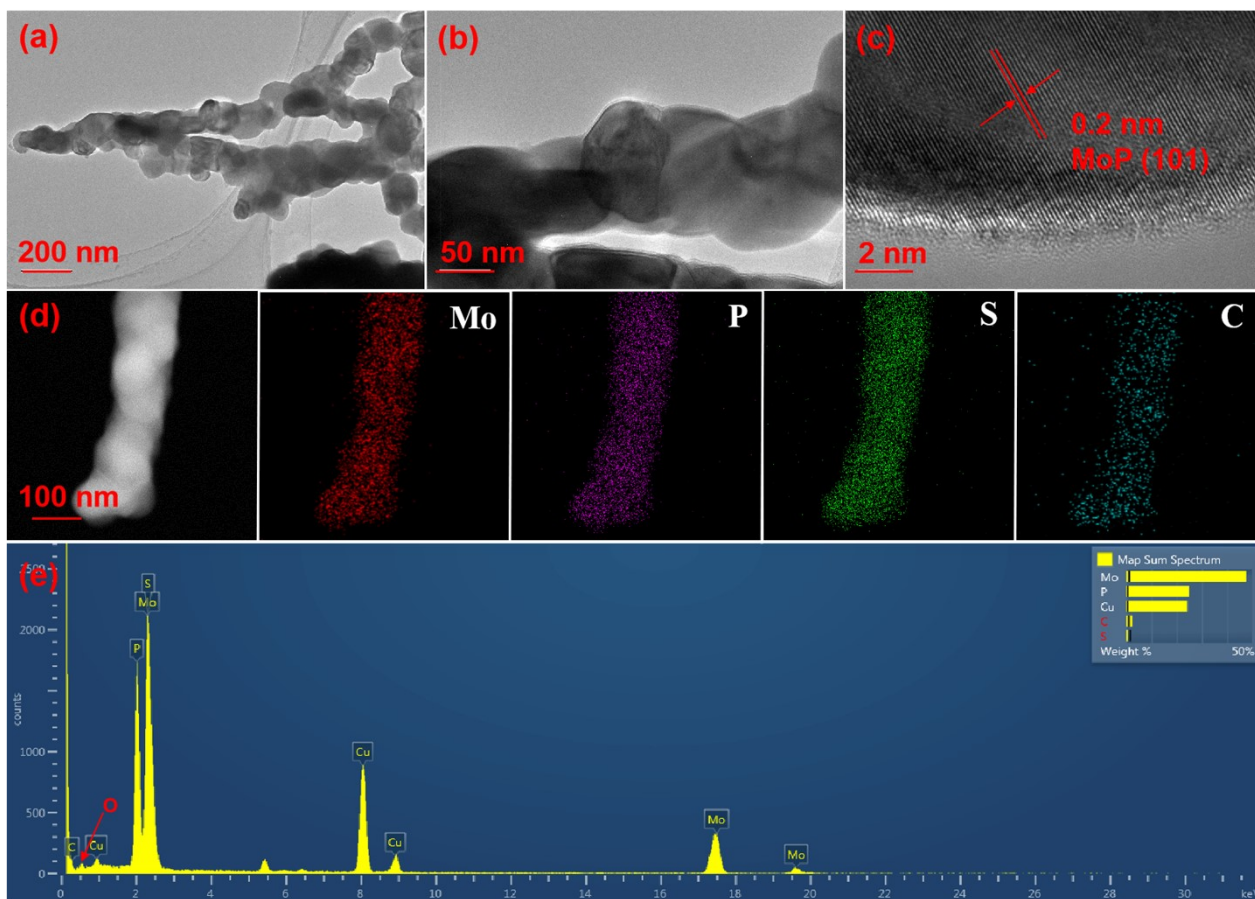

Figure S8. (a, b) TEM images and (c) HR-TEM image of P<sub>900</sub>-MoS<sub>2</sub>/Mo<sub>2</sub>C (d) corresponding EDS elemental mappings of P<sub>900</sub>-MoS<sub>2</sub>/Mo<sub>2</sub>C; (e) EDX spectra of P<sub>900</sub>-MoS<sub>2</sub>/Mo<sub>2</sub>C.

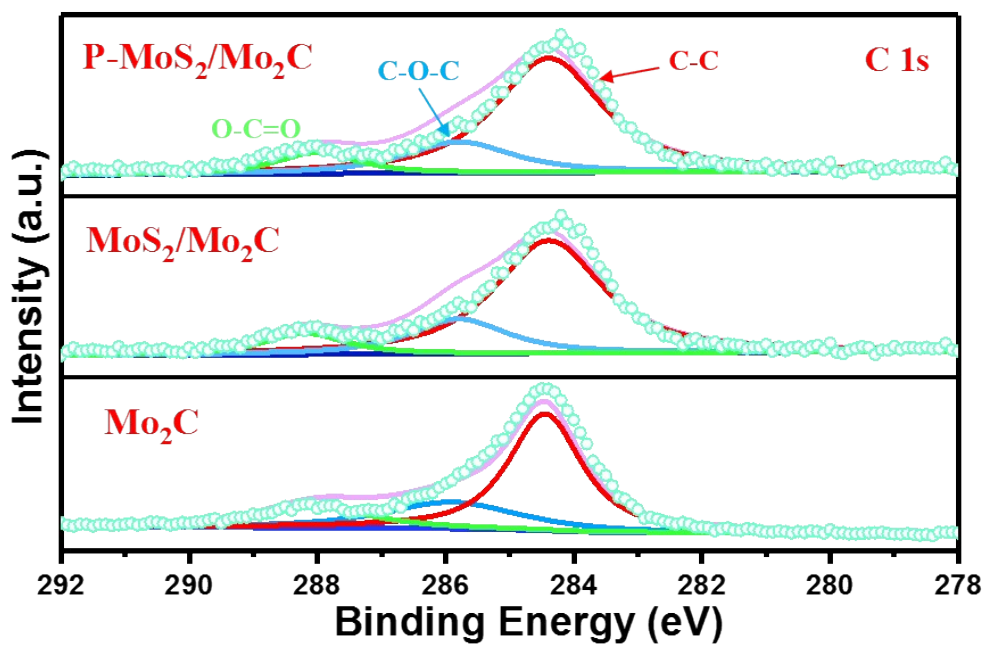

Figure S9. C 1s XPS of P-MoS<sub>2</sub>/Mo<sub>2</sub>C, MoS<sub>2</sub>/Mo<sub>2</sub>C and Mo<sub>2</sub>C.

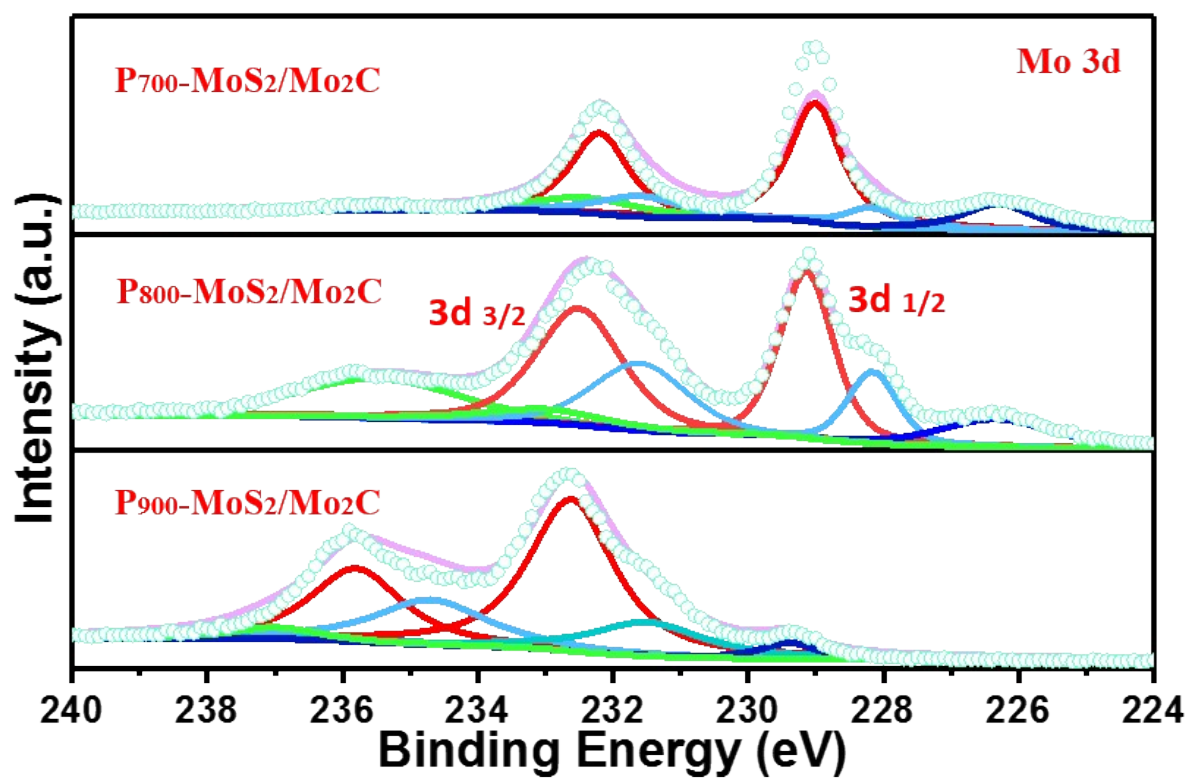

Figure S10. XPS of Mo 3d in different phosphating temperature (700°C, 800°C, 900°C).

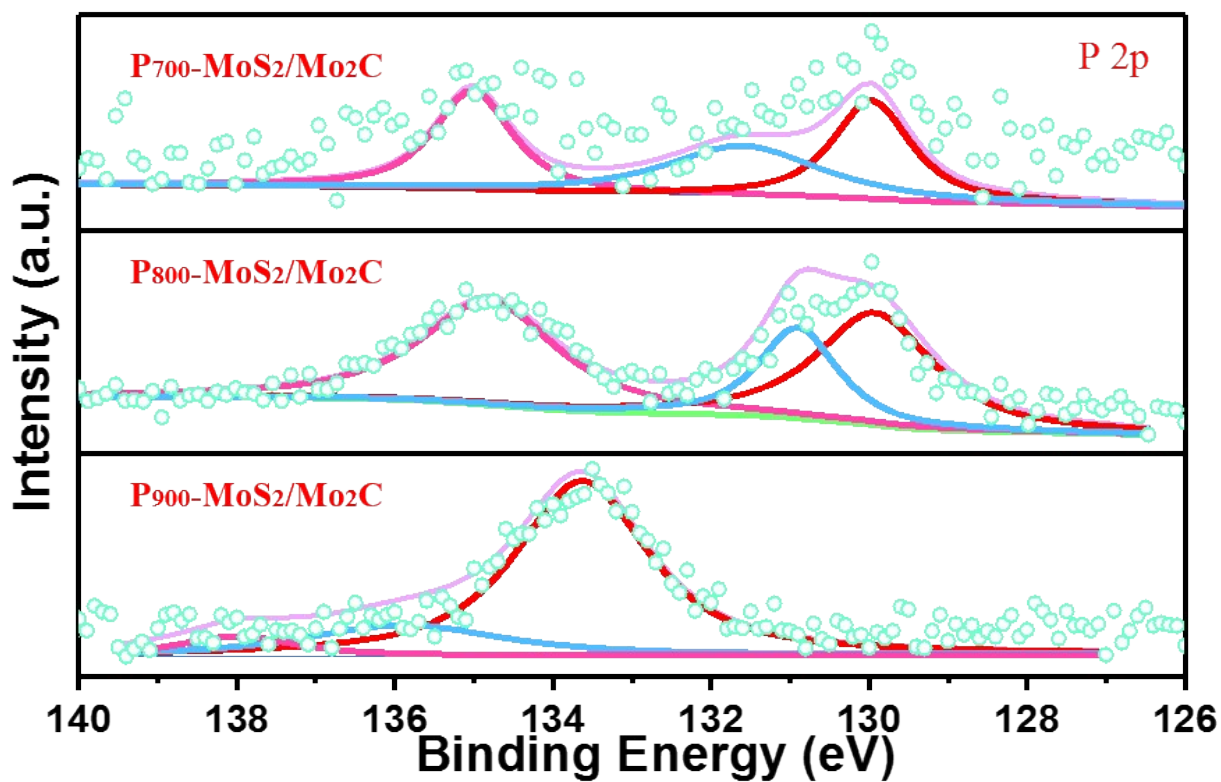

Figure S11. XPS of P 2p in different phosphating temperature (700°C, 800°C, 900°C)

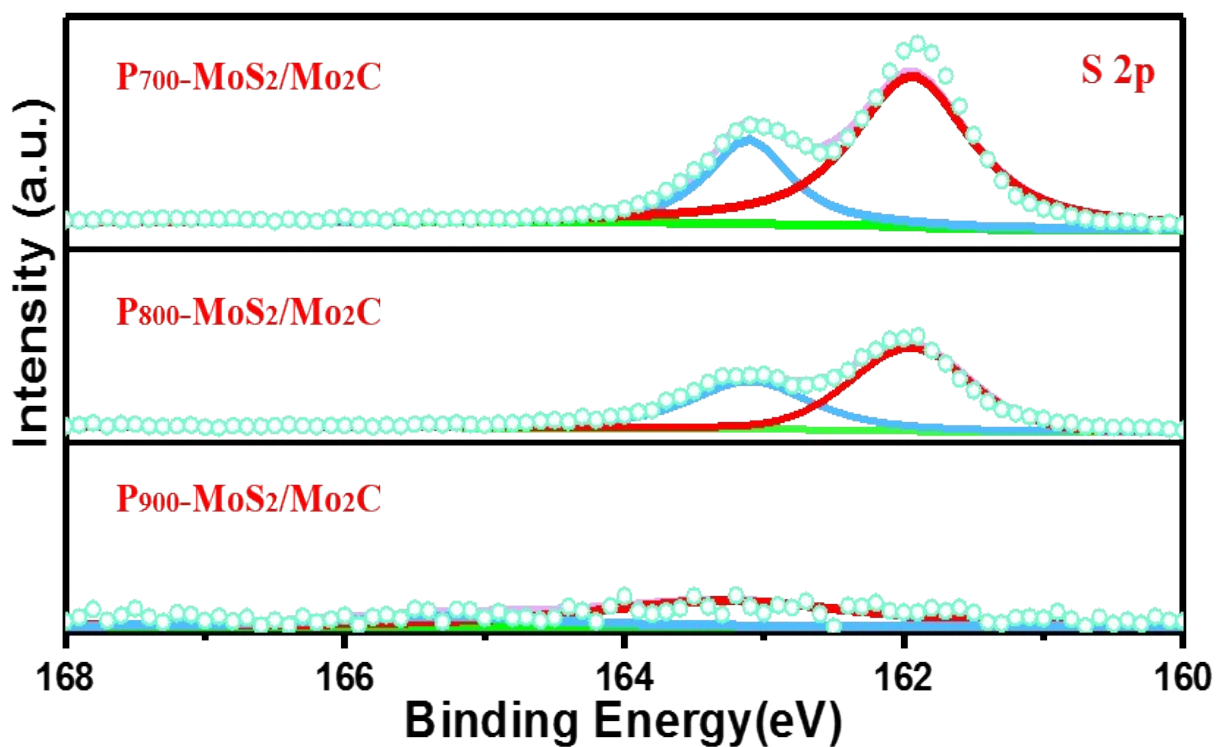

Figure S12. XPS of S 2p in different phosphating temperature (700°C, 800°C, 900°C)

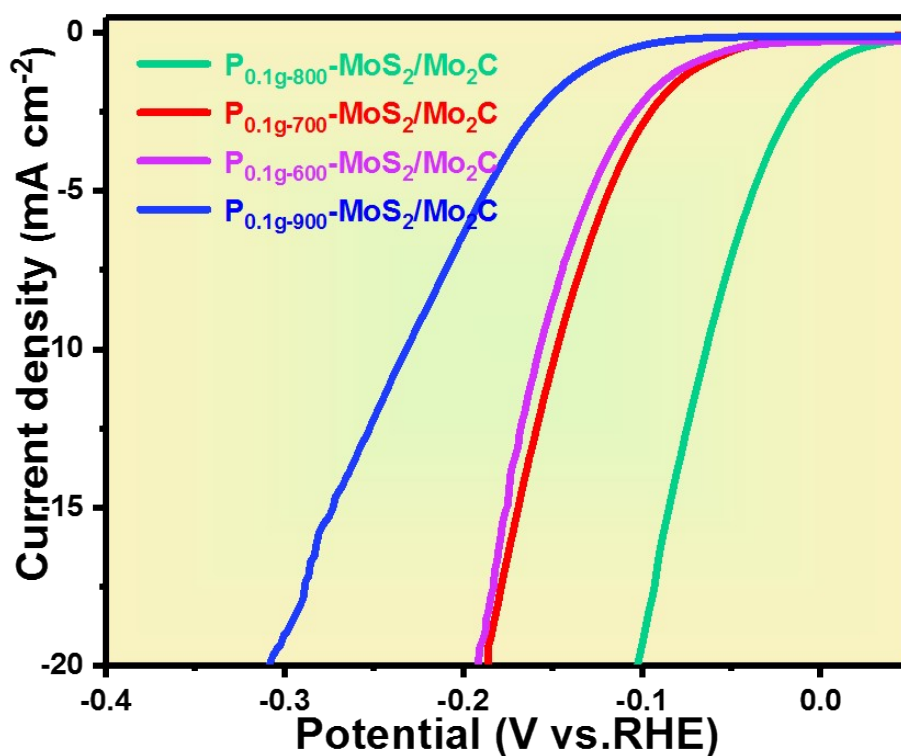

Figure S13. HER polarization curves tested at different phosphating temperature (900°C, 800°C, 700°C, and 600 °C) in 1 M KOH.

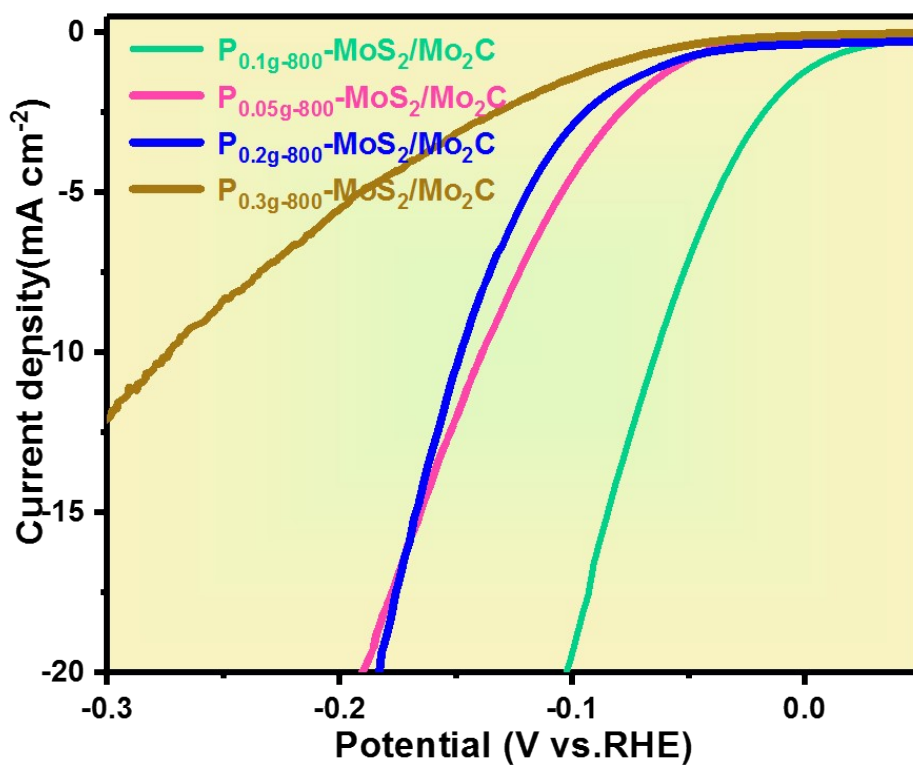

Figure S14. HER polarization curves tested of different phosphorus content (0.05, 0.1, 0.2, and 0.3 g) at 800°C.

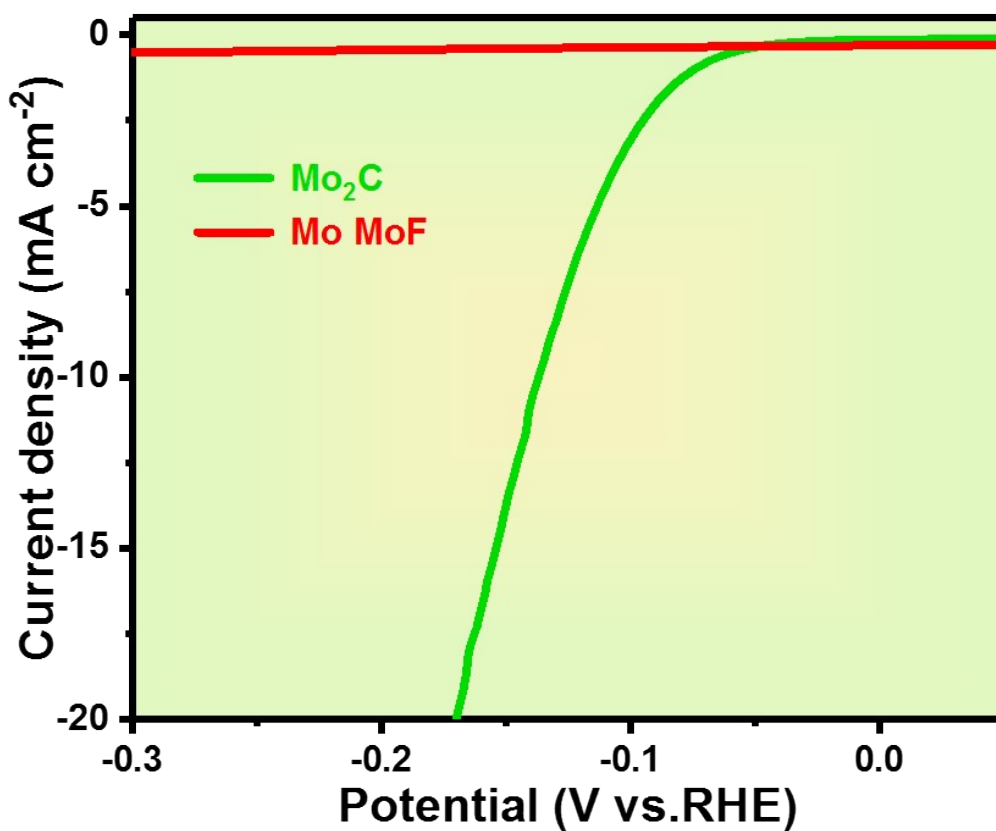

Figure S15. HER polarization curves tested of Mo<sub>2</sub>C and Mo MOF.

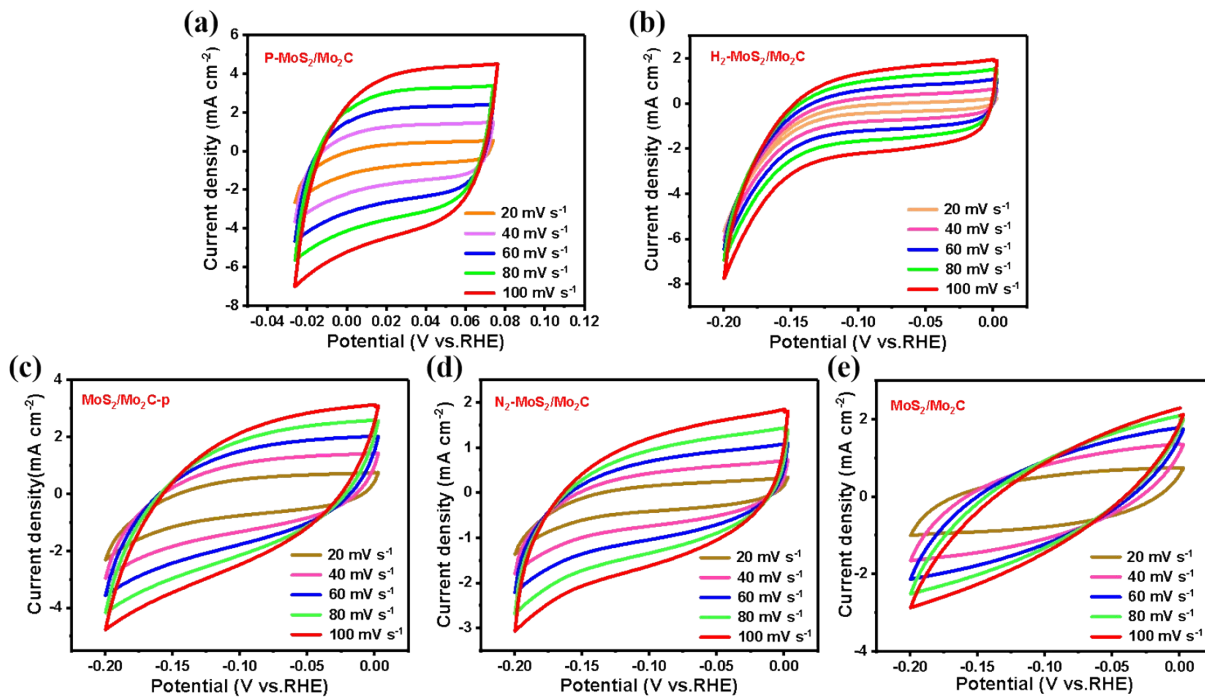

Figure S16. Typical cyclic voltammograms at different scan rates from 20 to 100  $\text{mV s}^{-1}$ . (a) P-MoS<sub>2</sub>/Mo<sub>2</sub>C; (b) H<sub>2</sub>-MoS<sub>2</sub>/Mo<sub>2</sub>C; (c) MoS<sub>2</sub>/Mo<sub>2</sub>C-p; (d) N<sub>2</sub>-MoS<sub>2</sub>/Mo<sub>2</sub>C and (e) MoS<sub>2</sub>/Mo<sub>2</sub>C. The scanning potential range is from

1.023 V to 1.223V vs SCE.

Table S1. Summary of various MoS<sub>2</sub>-based catalysts for HER in 1 M KOH.

| Catalyst                                           | Tafel slope      |                         | Reference                                                |
|----------------------------------------------------|------------------|-------------------------|----------------------------------------------------------|
|                                                    | $\eta_{10}$ (mV) | (mV dec <sup>-1</sup> ) |                                                          |
| P-MoS <sub>2</sub> /Mo <sub>2</sub> C              | 66               | 67                      | This work                                                |
| H-MoS <sub>2</sub> /MoP                            | 92               | 59                      | Small, 2020, 16, 2002482 <sup>1</sup>                    |
| N-MoP/CC                                           | 70               | –                       | Appl. Catal. B: Environ., (2019) 118441 <sup>2</sup>     |
| MoS <sub>2</sub> /Mo <sub>2</sub> C                | 63               | 48                      | ACS Catal.,(2017),7,7312-7318 <sup>3</sup>               |
| MoS <sub>2</sub> /CoNi <sub>2</sub> S <sub>4</sub> | 78               | 67.4                    | Adv. Funct. Mater.,(2019) 1908520 <sup>4</sup>           |
| MoS <sub>2</sub> /NiCoS                            | 189              | 75                      | J. Mater. Chem. A, 2019, 7, 27594-27602 <sup>5</sup>     |
| NiS/MoS <sub>2</sub>                               | 174              | 70.2                    | J. Mater. Chem. A, 2019,7,21514-21522 <sup>6</sup>       |
| MoS <sub>2</sub>                                   | 153              | 73                      | ACS Energy Lett. 2019, 4, 2830-2835 <sup>7</sup>         |
| CuS@MoS <sub>2</sub>                               | 135              | 50                      | J. Colloid Interface Sci., 2020, 564, 77-87 <sup>8</sup> |
| N-doped MoS <sub>2</sub>                           | 114              | 46.8                    | J. Am. Chem. Soc. 2019, 141, 18578-1858 <sup>9</sup>     |
| CoP/CN@MoS <sub>2</sub>                            | 149              | 88                      | ACS Appl. Mater. Interfaces 2019,11, 366 <sup>10</sup>   |

---

## References

1. Q. Liu, Z. Xue, B. Jia, Q. Liu, K. Liu, Y. Lin, M. Liu, Y. Li and G. Li, Hierarchical nanorods of MoS<sub>2</sub>/MoP heterojunction for efficient electrocatalytic hydrogen evolution reaction, *Small*, 2020, **16**, 2002482.
2. C. G. López-Calixto, M. Liras, V. A. de la Peña O'Shea and R. Pérez-Ruiz, Synchronized biphotonic process triggering CC coupling catalytic reactions, *Applied Catalysis B: Environmental*, 2018, **237**, 18-23.
3. Z. Zhao, F. Qin, S. Kasiraju, L. Xie, M. Alam, Vertically Aligned MoS<sub>2</sub>/Mo<sub>2</sub>C hybrid Nanosheets Grown on Carbon Paper for Efficient Electrocatalytic Hydrogen Evolution, *ACS Catal.*, 2017, **7**, 7312-7318.
4. J. Hu, C. Zhang, P. Yang, J. Xiao, T. Deng, Z. Liu, B. Huang, M. K. H. Leung and S. Yang, Kinetic-Oriented Construction of MoS<sub>2</sub> Synergistic Interface to Boost pH-Universal Hydrogen Evolution, *Adv. Funct. Mater.*, 2019, **30**, 1908520.
5. C. Qin, A. Fan, X. Zhang, S. Wang, X. Yuan and X. Dai, Interface engineering: few-layer MoS<sub>2</sub> coupled to a NiCo-sulfide nanosheet heterostructure as a bifunctional electrocatalyst for overall water splitting, *Journal of Materials Chemistry A*, 2019, **7**, 27594-27602.
6. A. Long, W. Li, M. Zhou, W. Gao, B. Liu, J. Wei, X. Zhang, H. Liu, Y. Liu and X. Zeng, MoS<sub>2</sub> nanosheets grown on nickel chalcogenides: controllable synthesis and electrocatalytic origins for the hydrogen evolution reaction in alkaline solution, *Journal of Materials Chemistry A*, 2019, **7**, 21514-21522.
7. H. A. Ariyanta, T. A. Ivandini and Y. Yulizar, A novel way of the synthesis of three-dimensional (3D) MoS<sub>2</sub> cauliflowers using allicin, *Chem. Phys. Lett.*, 2021, **767**, 138345.
8. L. Liu, X. Liu and S. Jiao, CuS@defect-rich MoS<sub>2</sub> core-shell structure for enhanced hydrogen evolution, *J. Colloid Interface Sci.*, 2020, **564**, 77-87.
9. H. Wang, X. Xiao, S. Liu, C.-L. Chiang, X. Kuai, C.-K. Peng, Y.-C. Lin, X. Meng, J. Zhao, J. Choi, Y.-G. Lin, J.-M. Lee and L. Gao, Structural and Electronic Optimization of MoS<sub>2</sub> Edges for Hydrogen Evolution, *J. Am. Chem. Soc.*, 2019, **141**, 18578-18584.
10. J.-G. Li, K. Xie, H. Sun, Z. Li, X. Ao, Z. Chen, K. K. Ostrikov, C. Wang and W. Zhang, Template-Directed Bifunctional Dodecahedral CoP/CN@MoS<sub>2</sub> Electrocatalyst for High Efficient Water Splitting, *ACS Appl. Mater. Interfaces*, 2019, **11**, 36649-36657.
